# Supplementary material for: Intelligent Operation of Wheel Loader Based on Electrohydraulic Proportional Control
Source: Hindawi journal article supplement (doi:10.1155/2020/1730946), 2020-04-25
Supplement: f1 [file 1730946.f1.zip]

Archive with 10 entries (9 files):
- 1730946.f1/Wheel Loader data/
- 1730946.f1/Wheel Loader data/0329-45-zhong-dongbi.d7d
- 1730946.f1/Wheel Loader data/1.mat
- 1730946.f1/Wheel Loader data/P90319-083704.jpg
- 1730946.f1/Wheel Loader data/P90319-152141.jpg
- 1730946.f1/Wheel Loader data/P90319-152153.jpg
- 1730946.f1/Wheel Loader data/P90319-152219.jpg
- 1730946.f1/Wheel Loader data/P90319-152246.jpg
- 1730946.f1/Wheel Loader data/P90319-152555.jpg
- 1730946.f1/Wheel Loader data/P90321-135439.jpg
