# Supplementary figures and images for: Intelligent Operation of Wheel Loader Based on Electrohydraulic Proportional Control
Source: Hindawi journal article supplement (doi:10.1155/2020/1730946), 2020-04-25

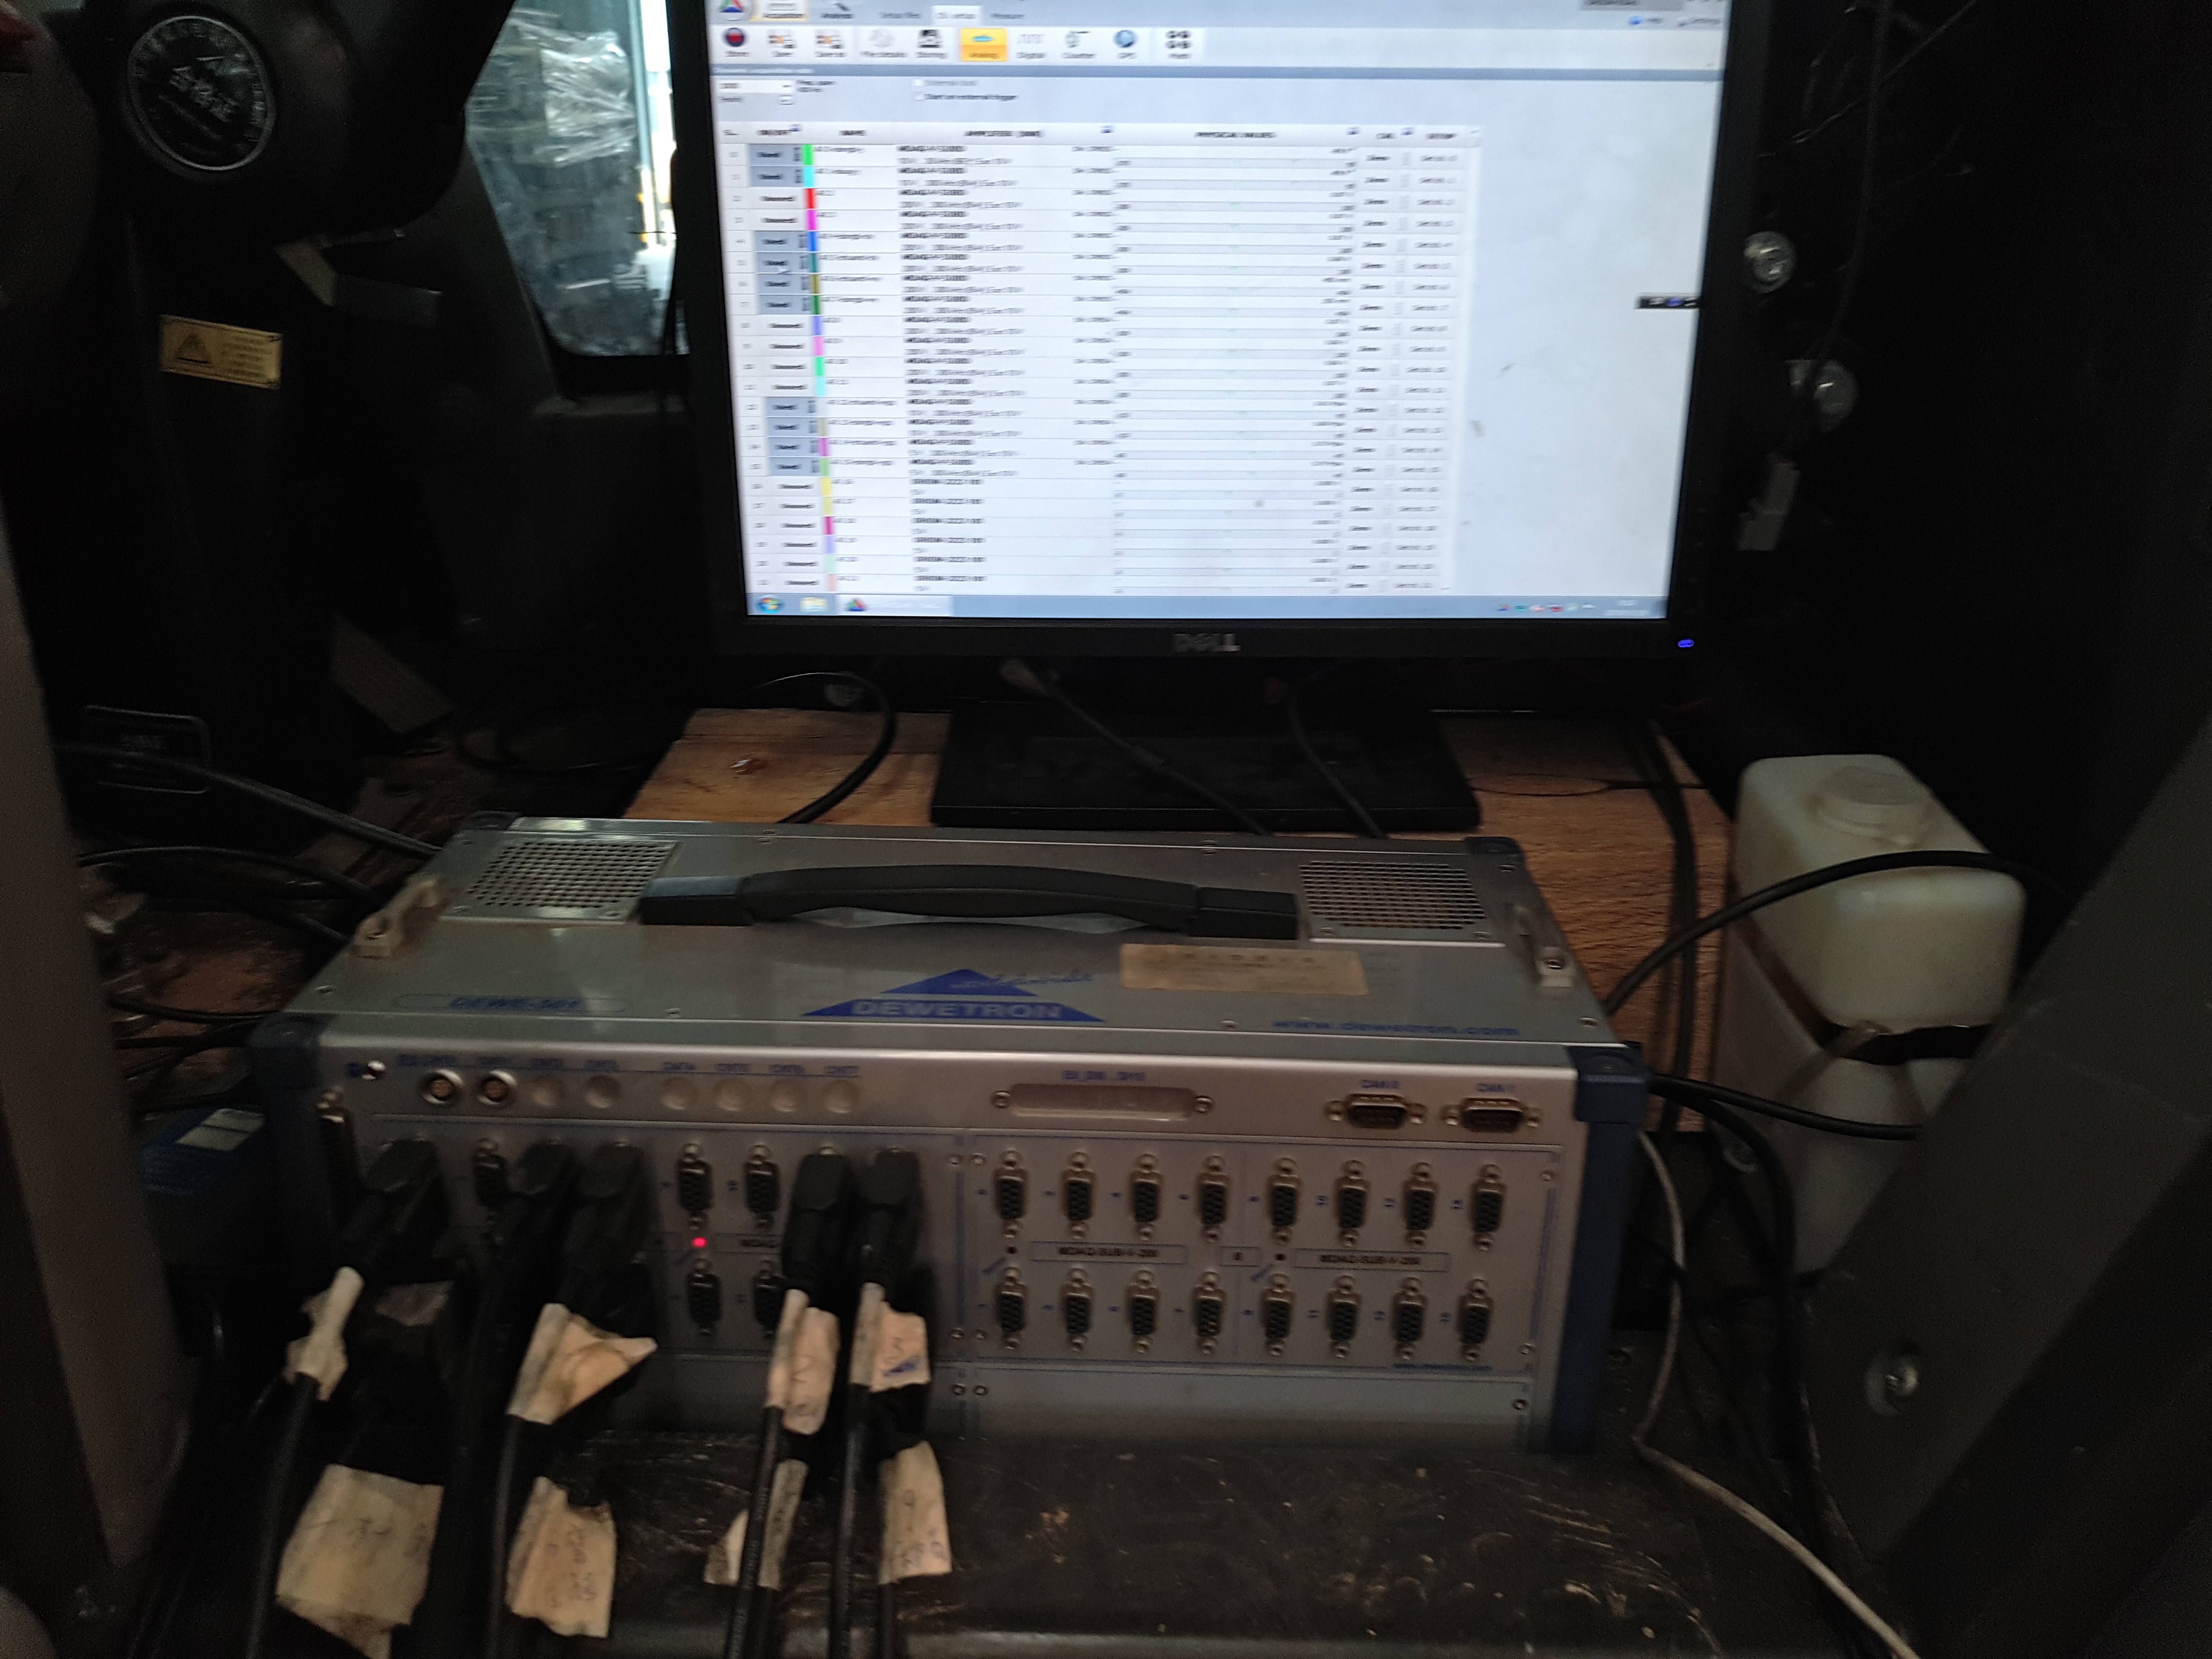

Supplement: f1 [file 1730946.f1.zip › 1730946.f1/Wheel Loader data/P90319-083704.jpg]

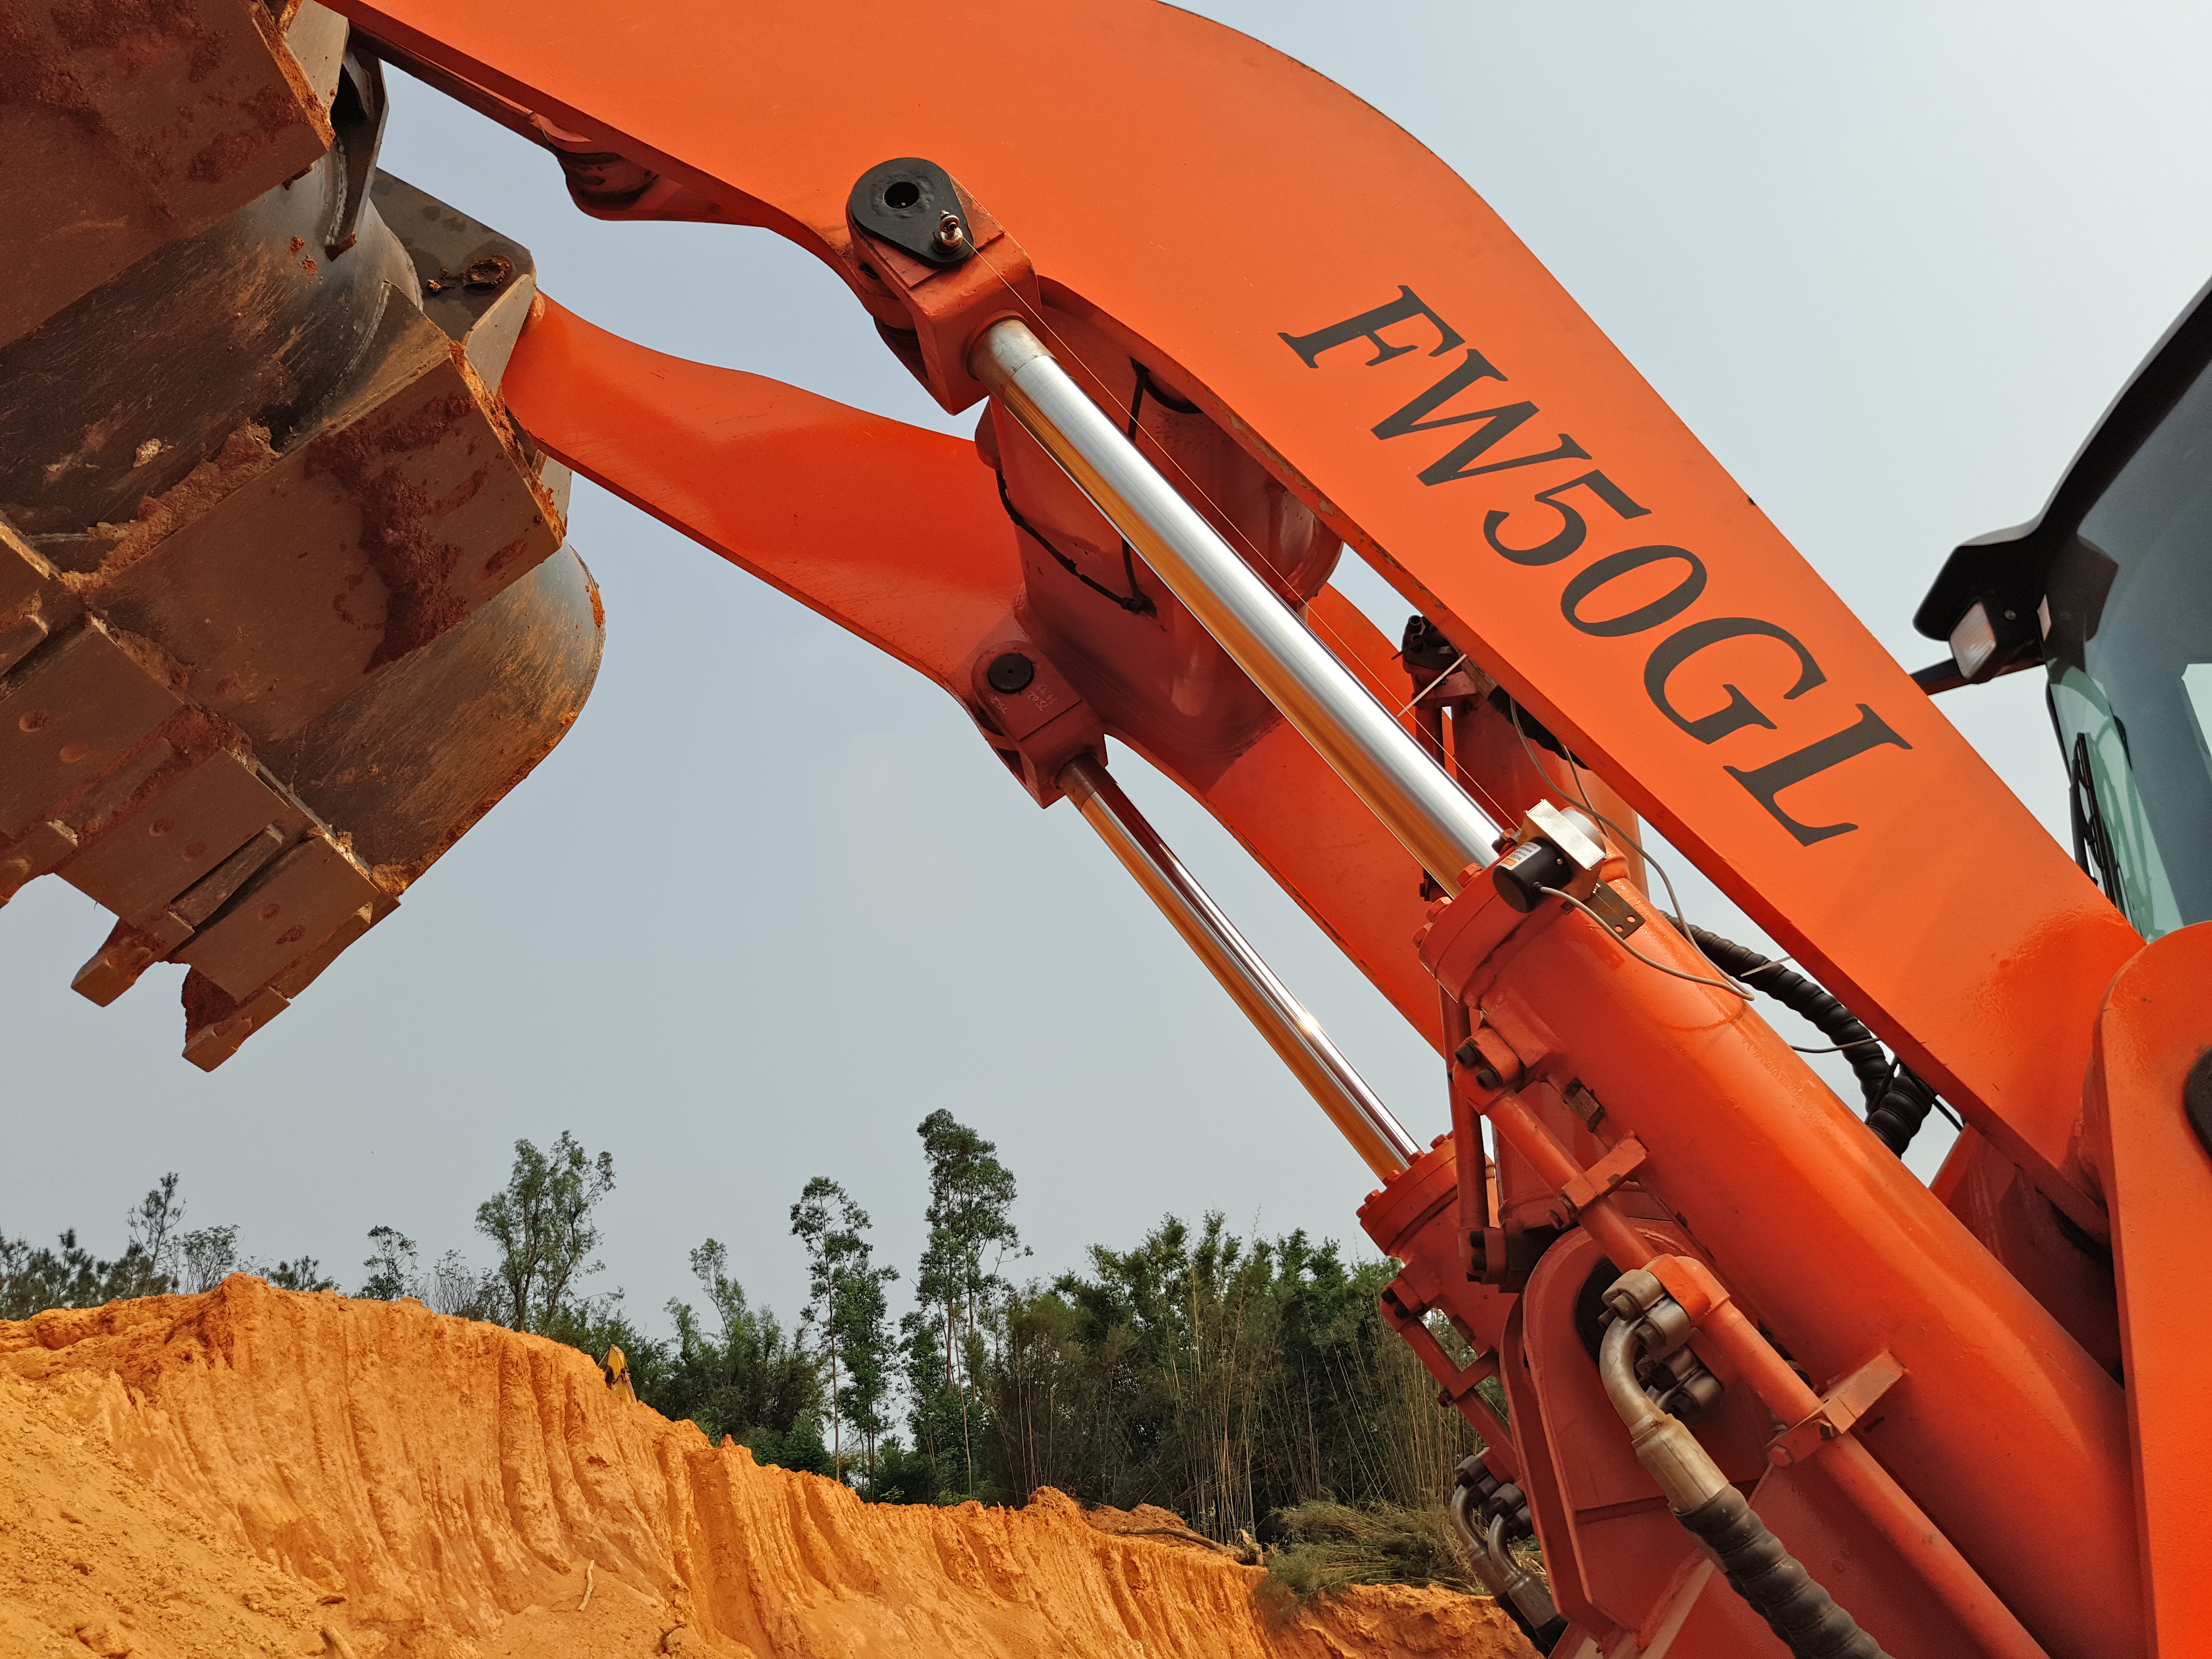

Supplement: f1 [file 1730946.f1.zip › 1730946.f1/Wheel Loader data/P90319-152141.jpg]

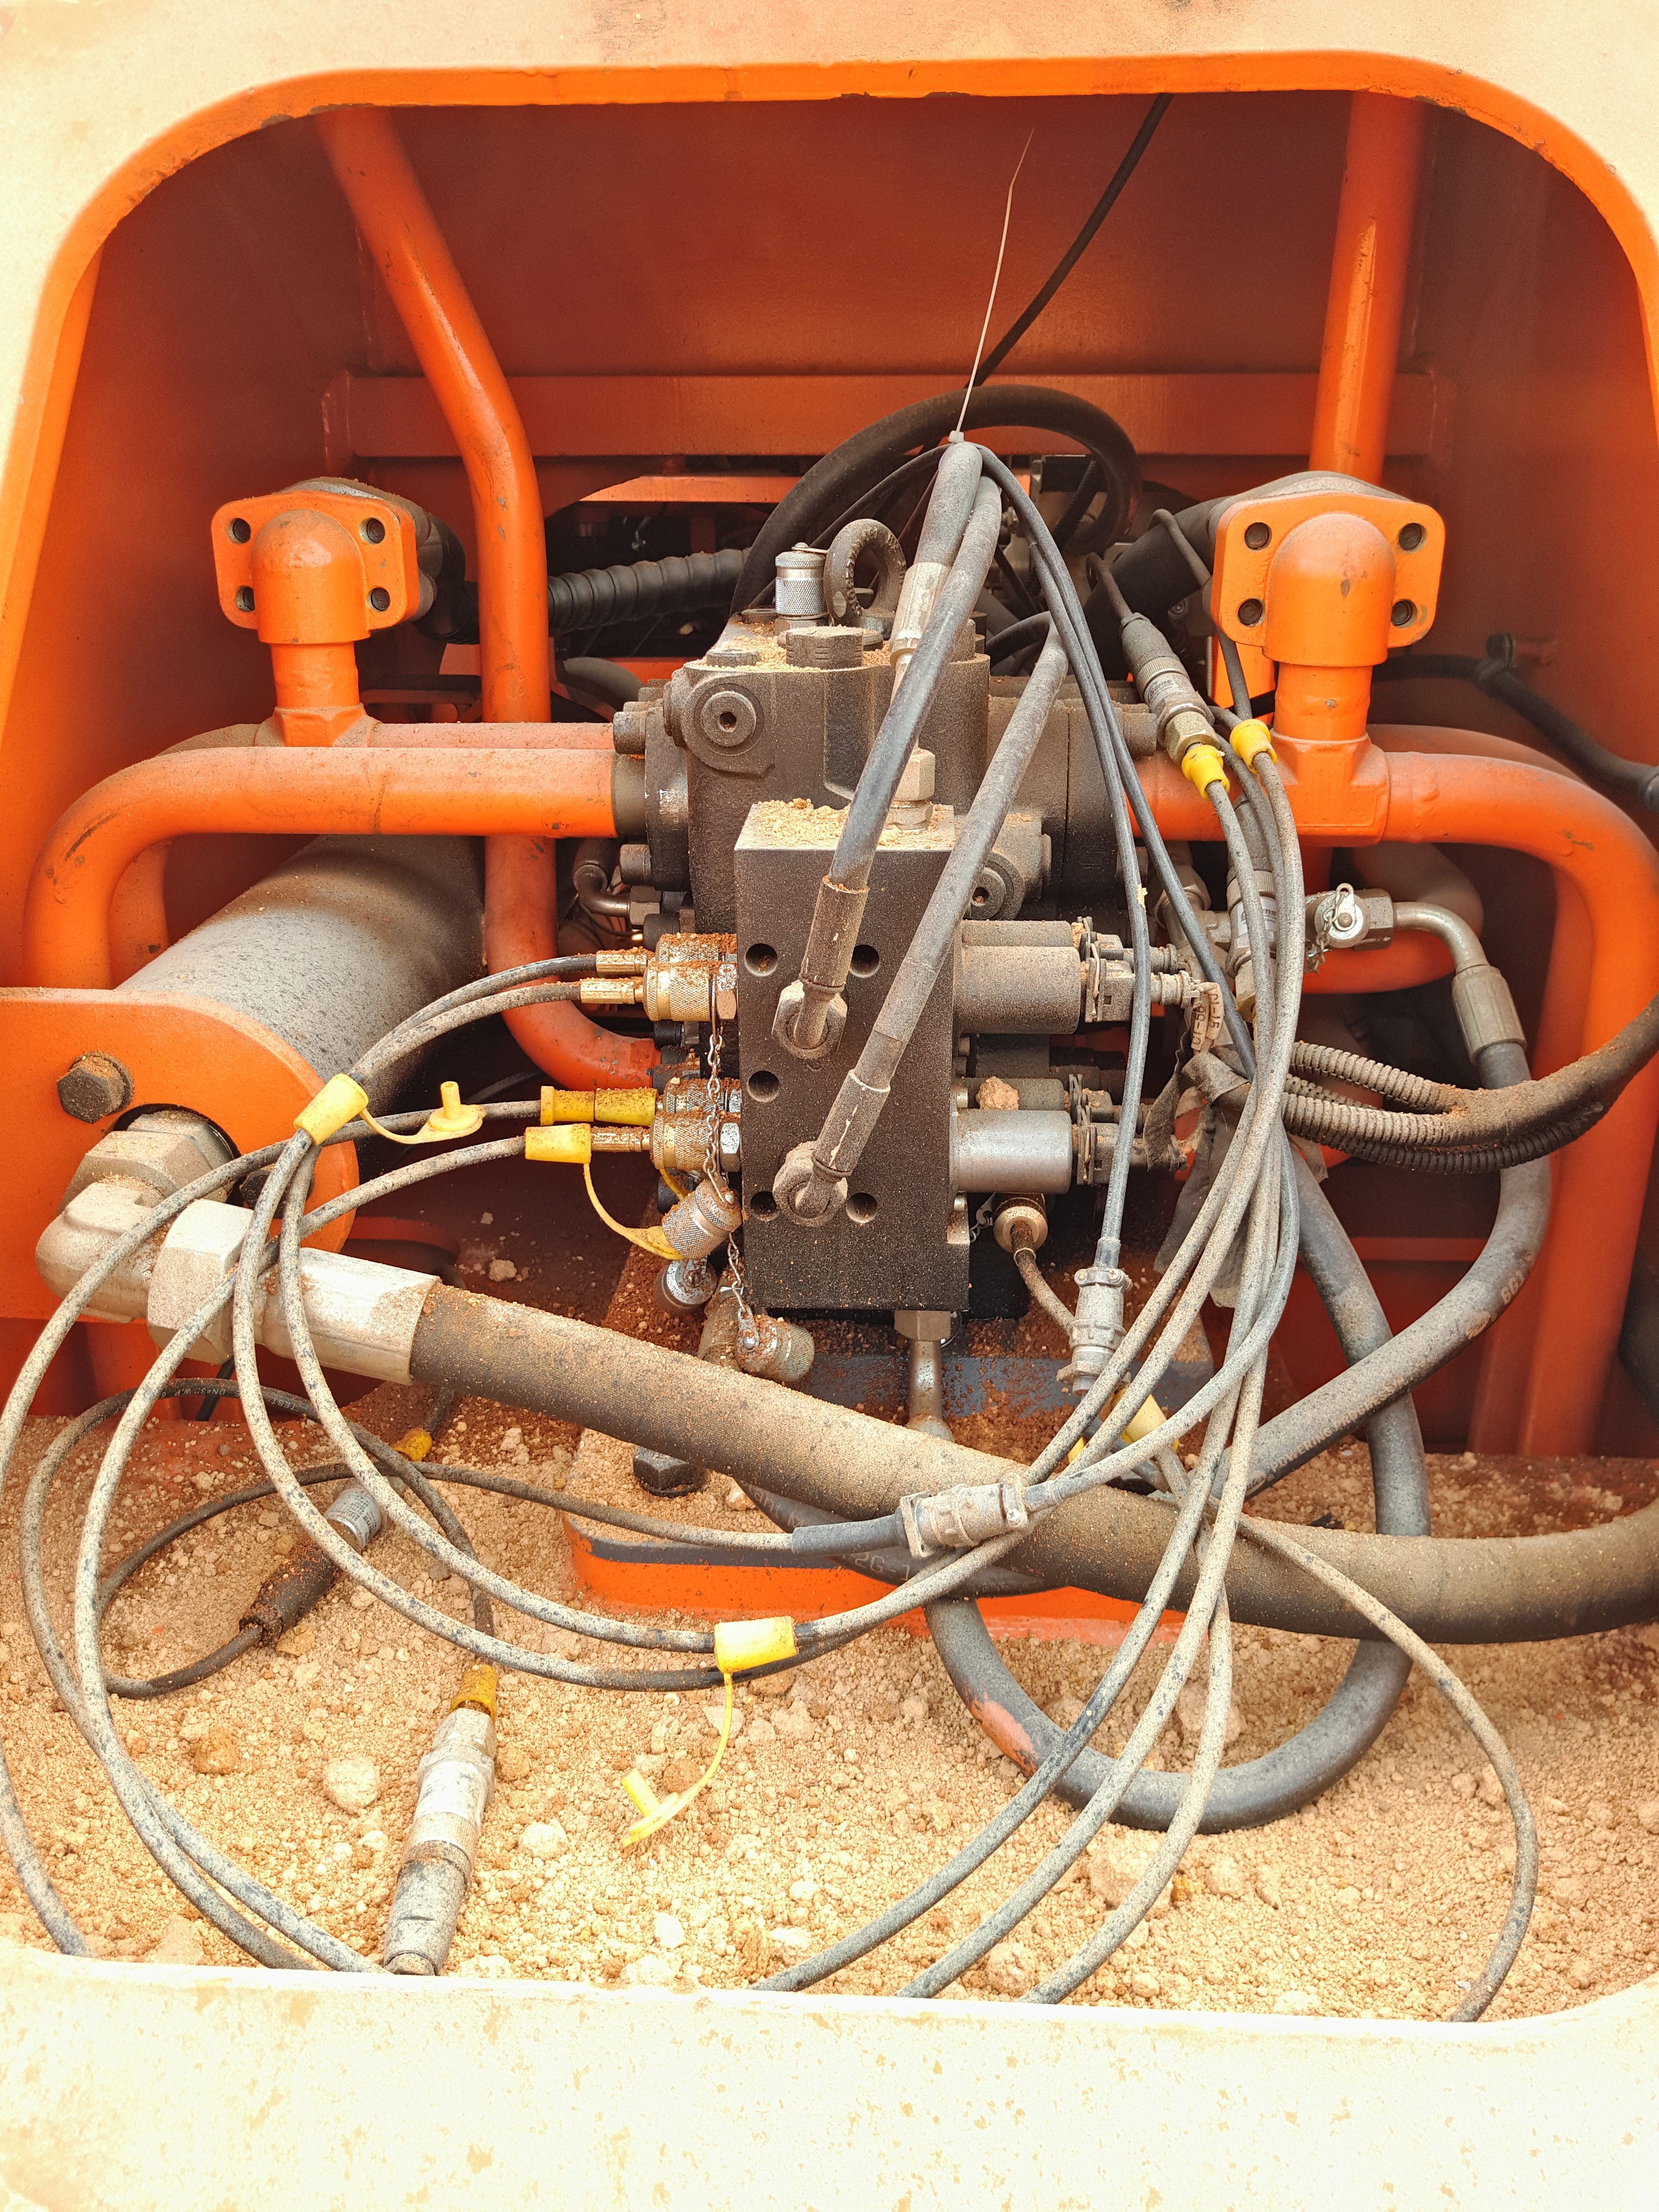

Supplement: f1 [file 1730946.f1.zip › 1730946.f1/Wheel Loader data/P90319-152153.jpg]

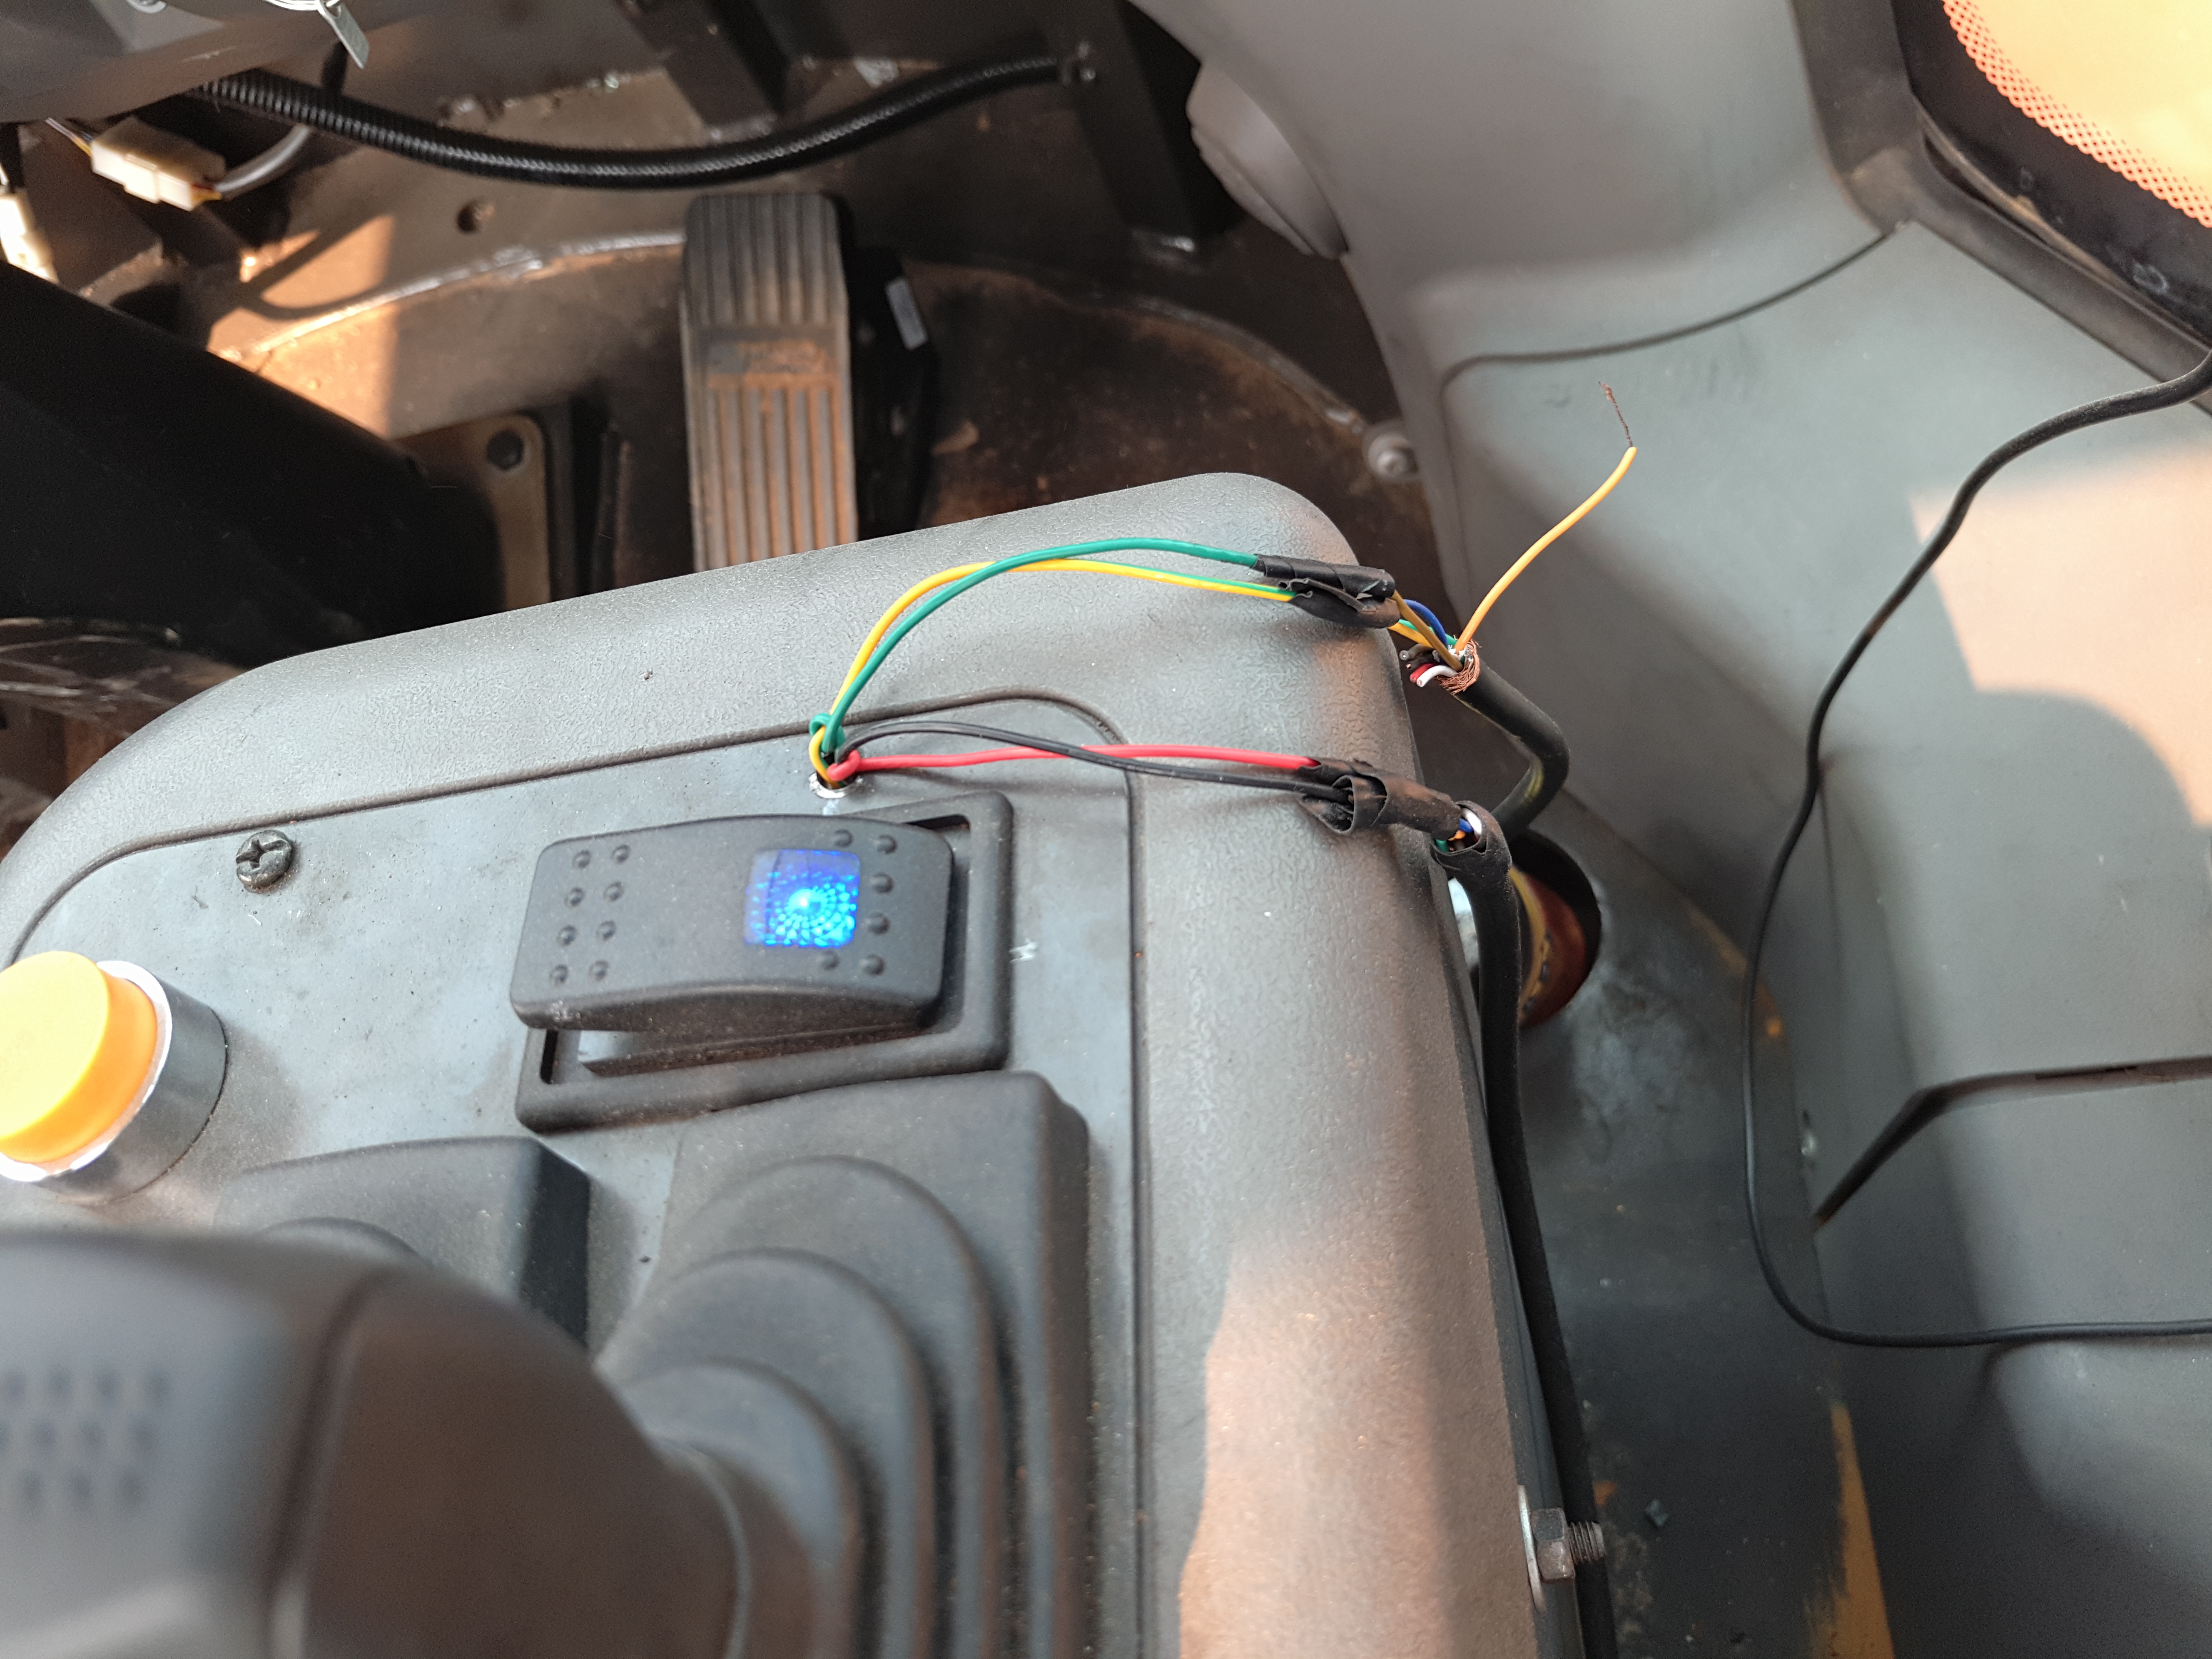

Supplement: f1 [file 1730946.f1.zip › 1730946.f1/Wheel Loader data/P90319-152219.jpg]

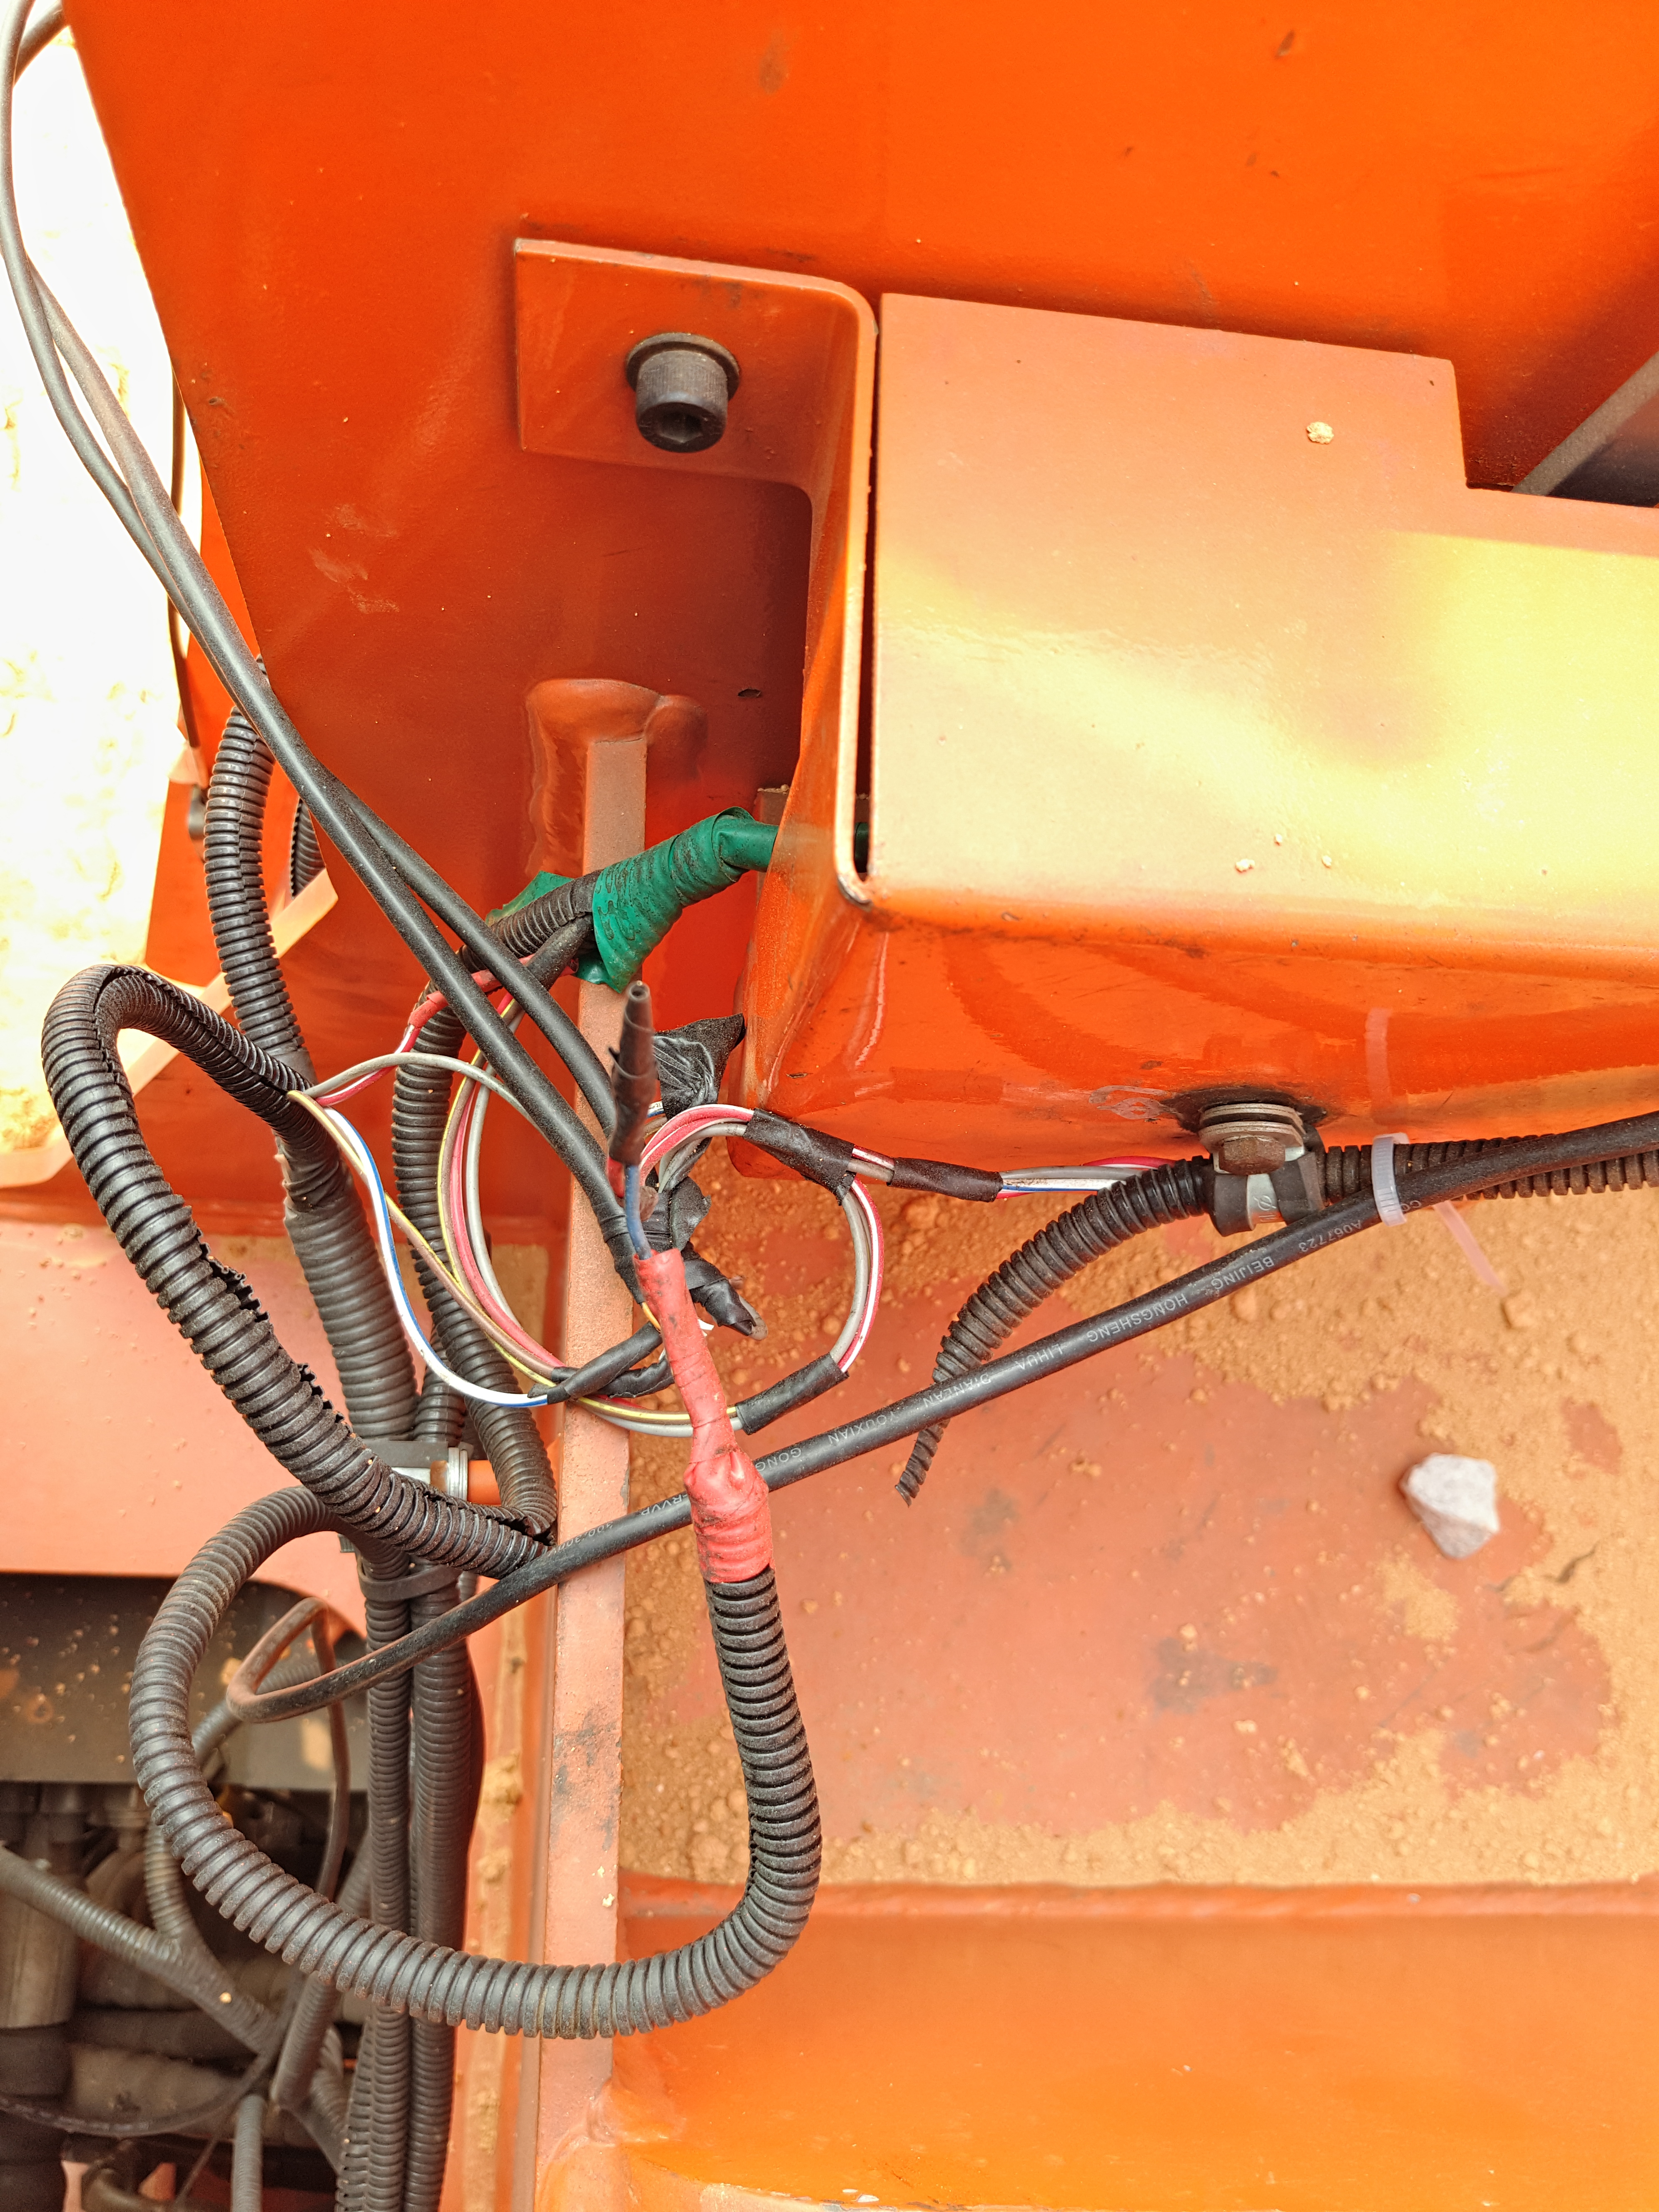

Supplement: f1 [file 1730946.f1.zip › 1730946.f1/Wheel Loader data/P90319-152246.jpg]

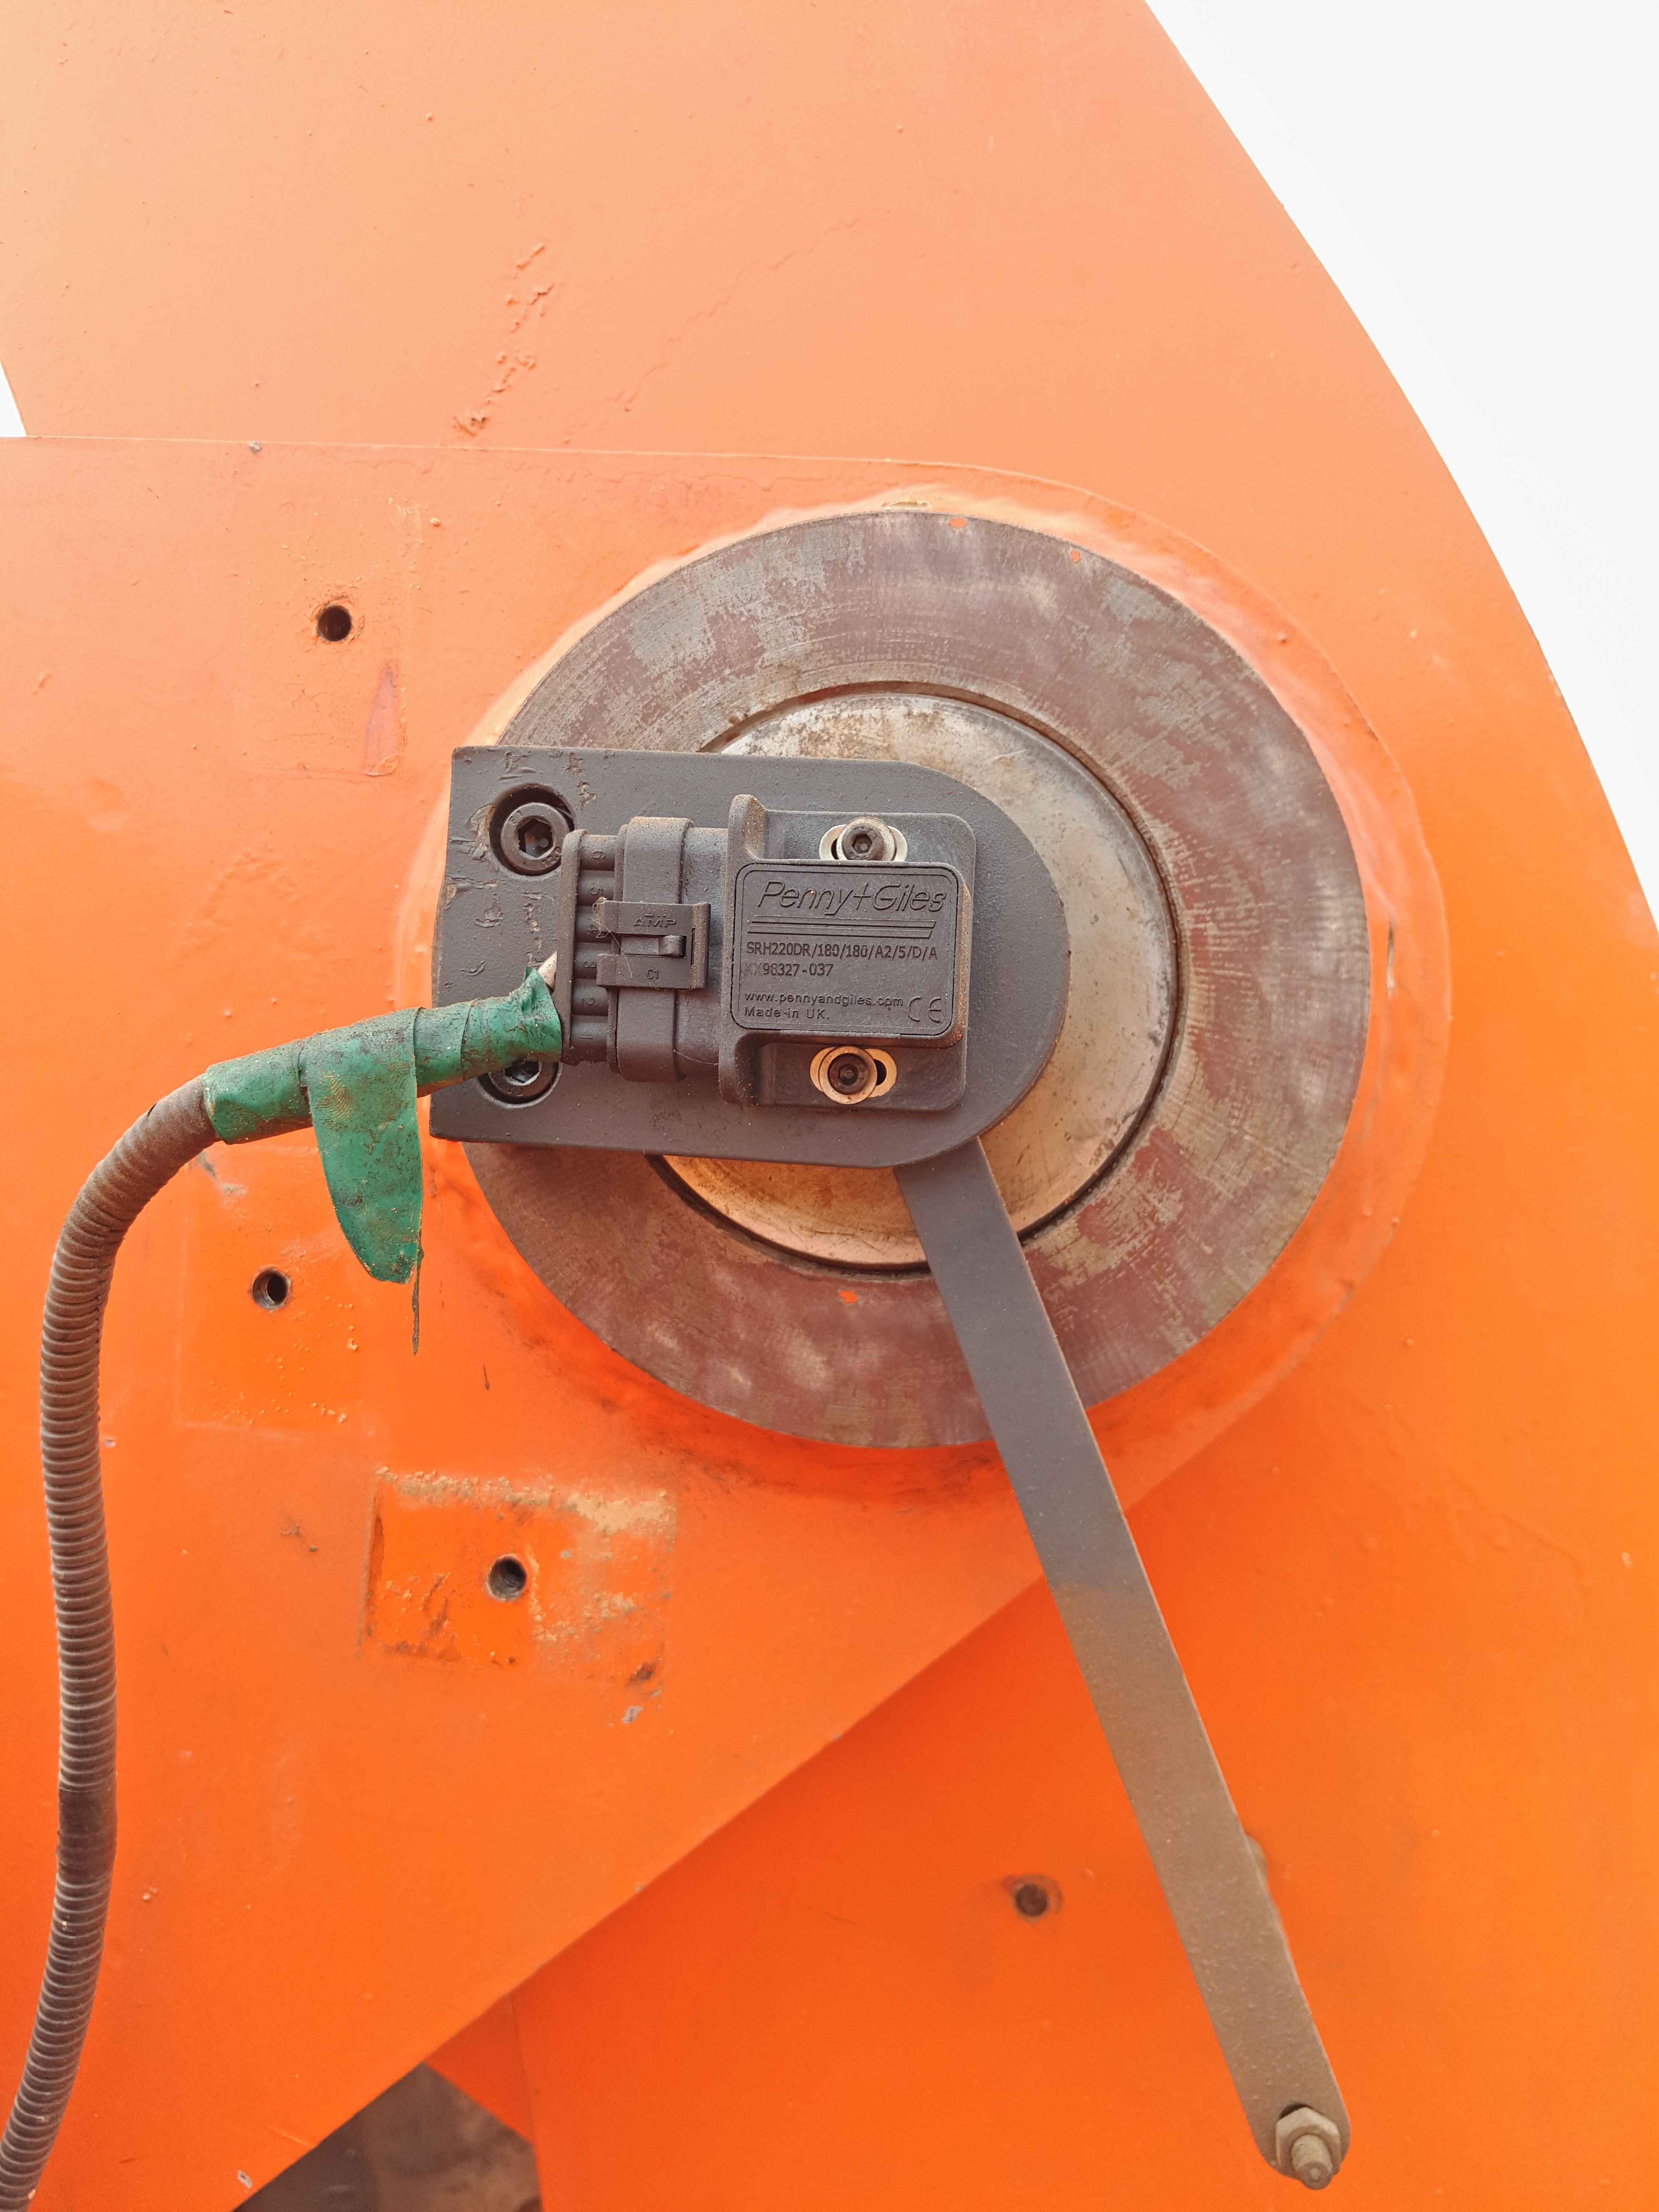

Supplement: f1 [file 1730946.f1.zip › 1730946.f1/Wheel Loader data/P90319-152555.jpg]

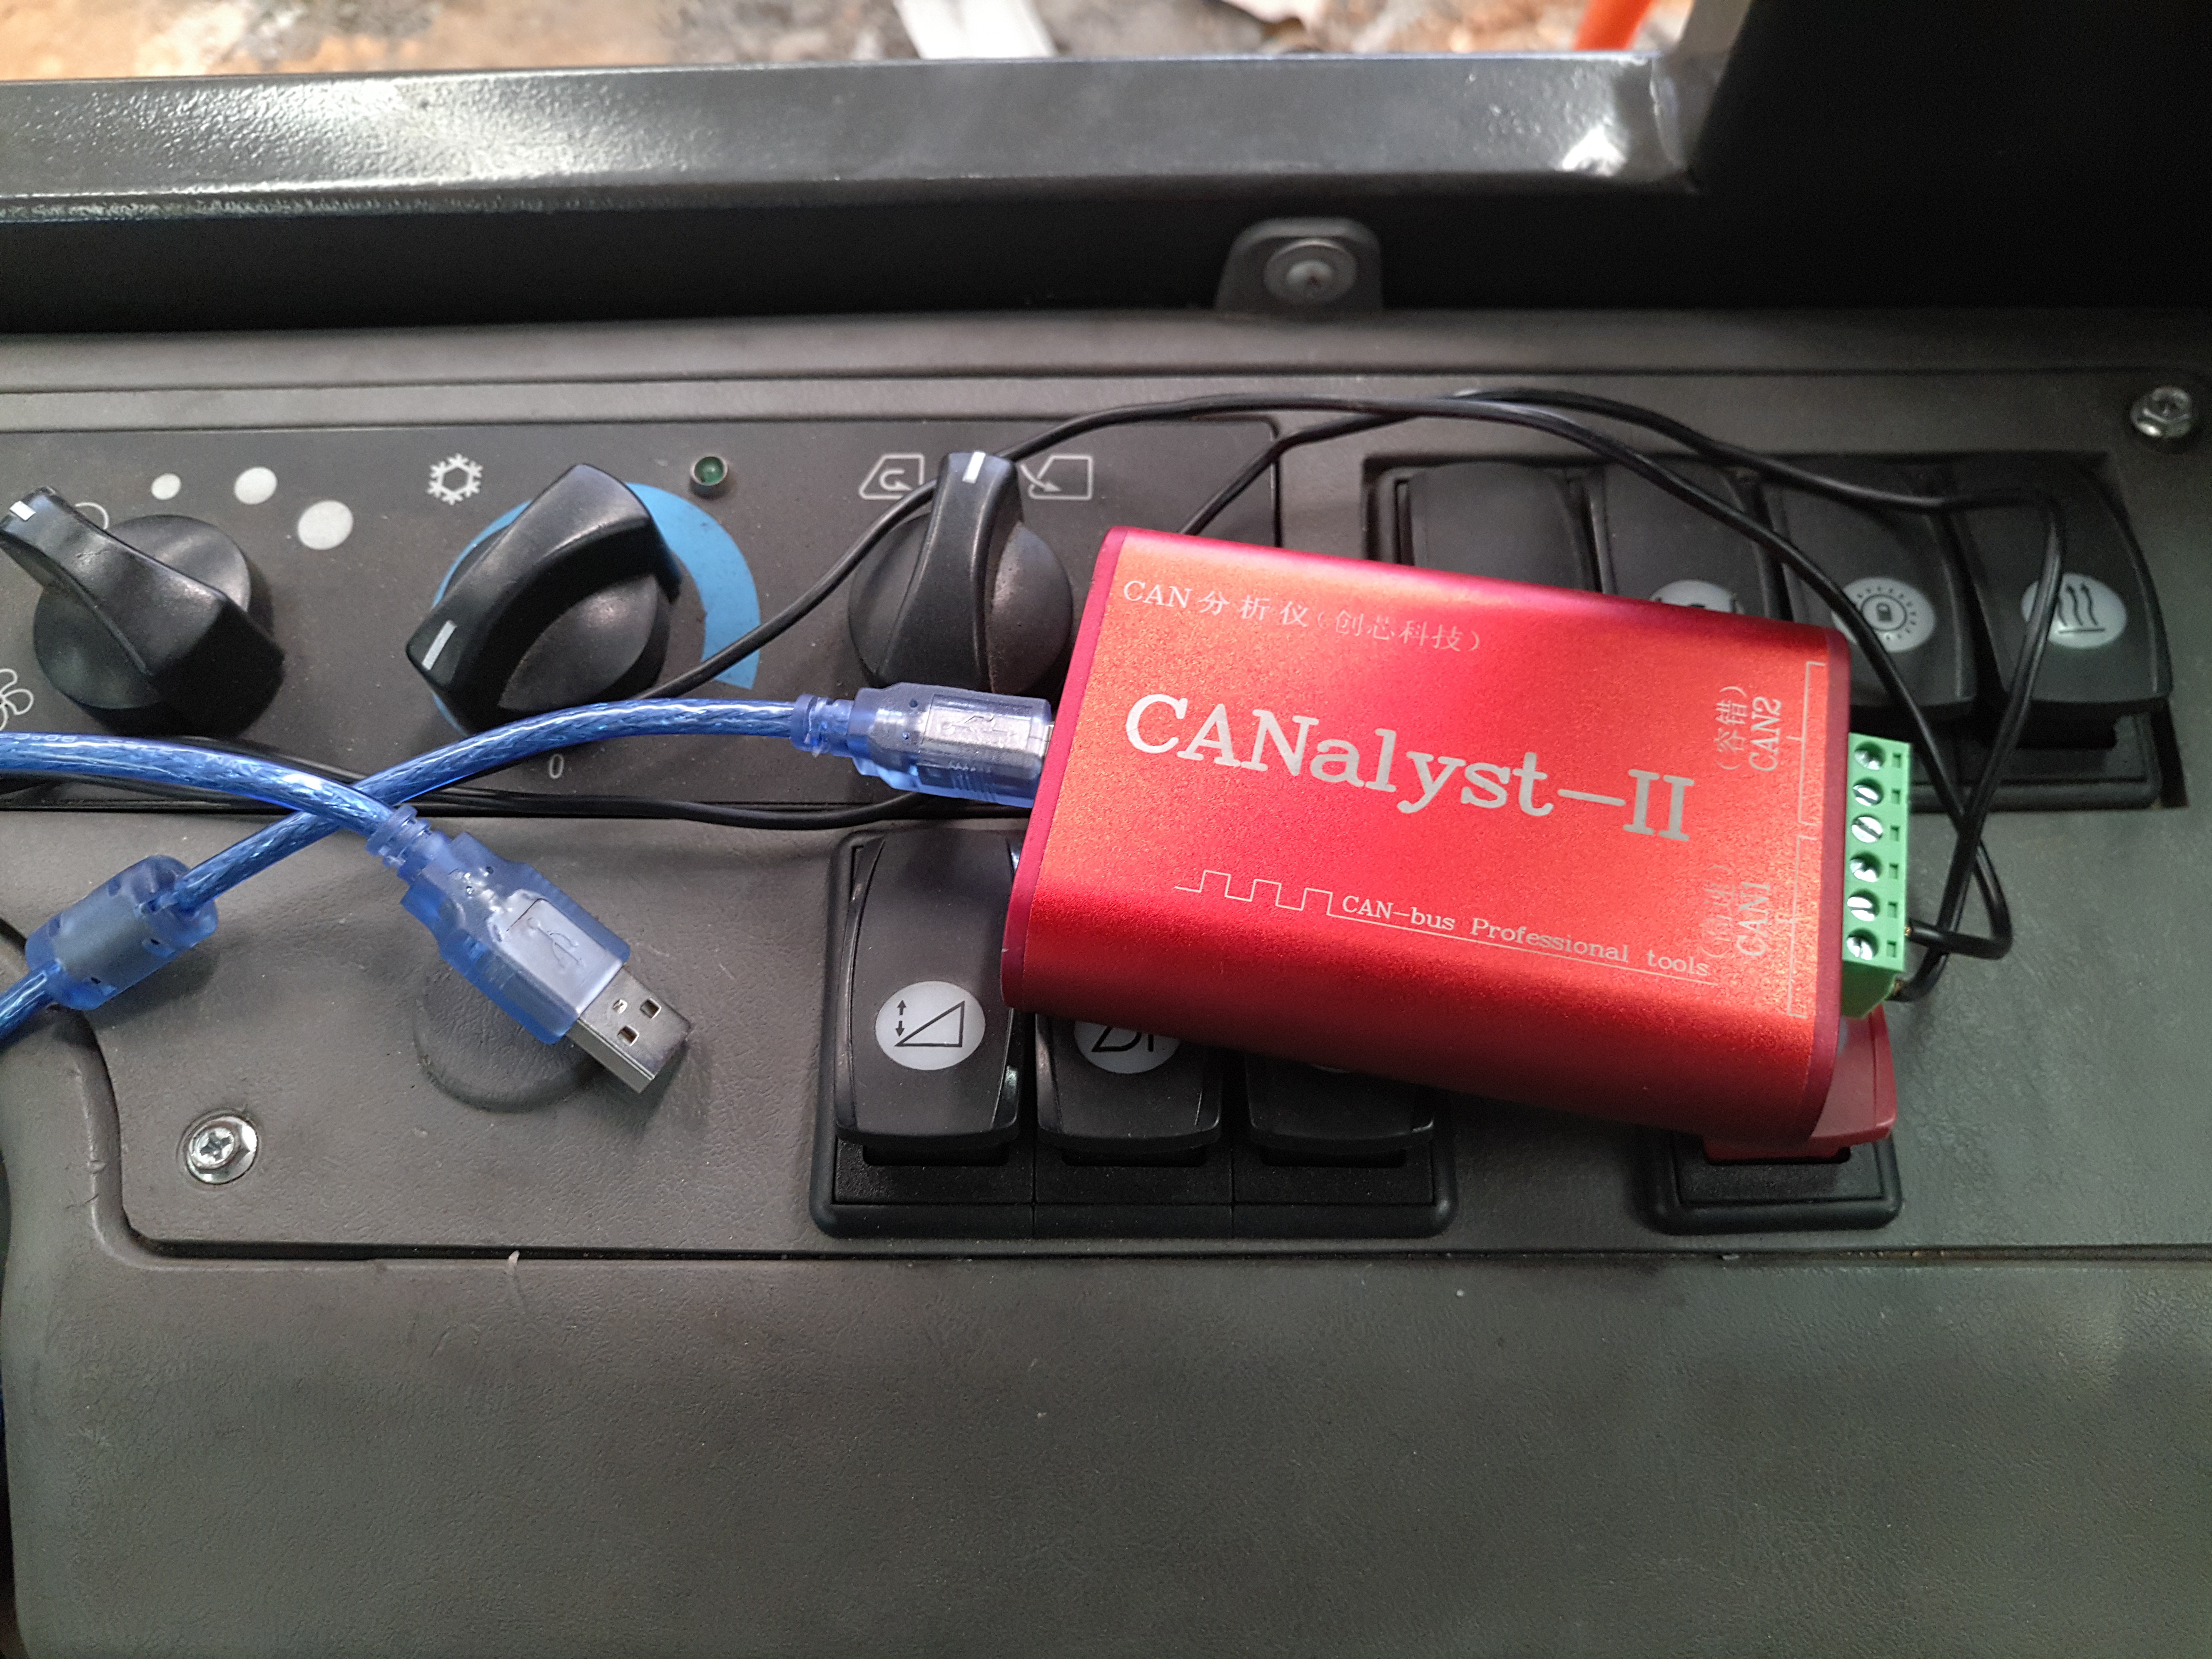

Supplement: f1 [file 1730946.f1.zip › 1730946.f1/Wheel Loader data/P90321-135439.jpg]
